# Supplementary material for: FoxP3+ regulatory CD4 T cells control the generation of functional CD8 memory
Source: PubMed Central journal article supplement — Nat Commun. 2012 Aug 7;3:986–. doi: 10.1038/ncomms1992 (PMC3432473; doi:10.1038/ncomms1992), 2012-08-07
Supplement: ncomms1992-s1.pdf [file ncomms1992-s1.pdf]

## Supplementary Figure S1

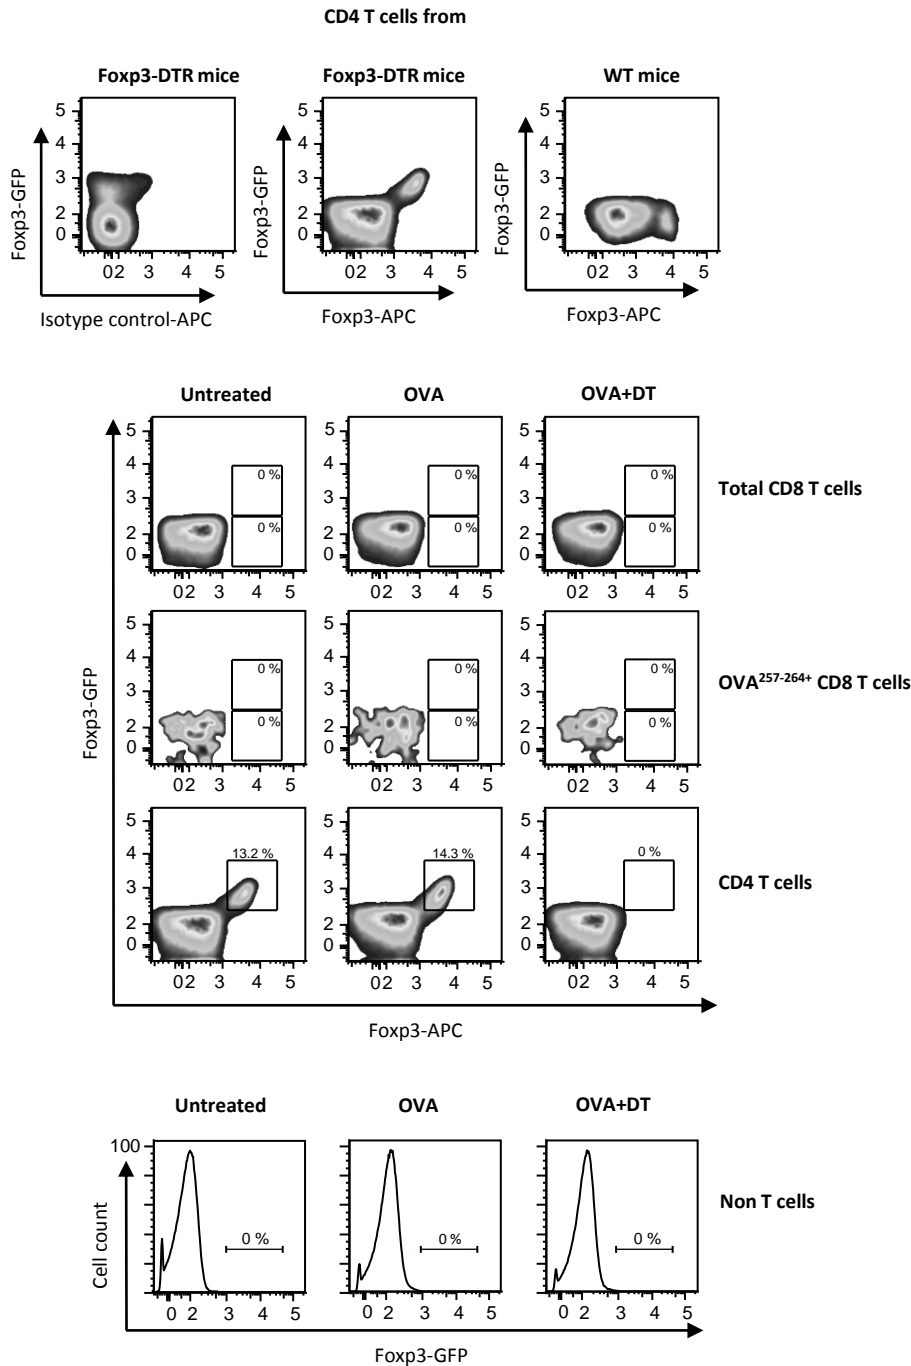

**Supplementary figure S1: CD8 T cells do not express FoxP3 either at rest or following antigen activation.** Foxp3-DTR mice were injected i.v. with  $10^4$  OT-I cells. Two days later, mice were vaccinated with OVA or left untreated. Some mice received 2 injections of DT at day 3 and 5 (OVA + DT). On day 6, splenocytes were stained with anti-CD3, anti-CD4, anti-CD8, dextramer OVA<sup>257-264</sup>-PE and anti-Foxp3-APC and analyzed by flow cytometry. Foxp3-expressing endogenous cells should be Foxp3-GFP<sup>+</sup> and Foxp3-APC<sup>+</sup> while exogenous OT-I cells, if Foxp3<sup>+</sup>, should be Foxp3-GFP<sup>-</sup> but Foxp3-APC<sup>+</sup>.

## Supplementary Figure S2

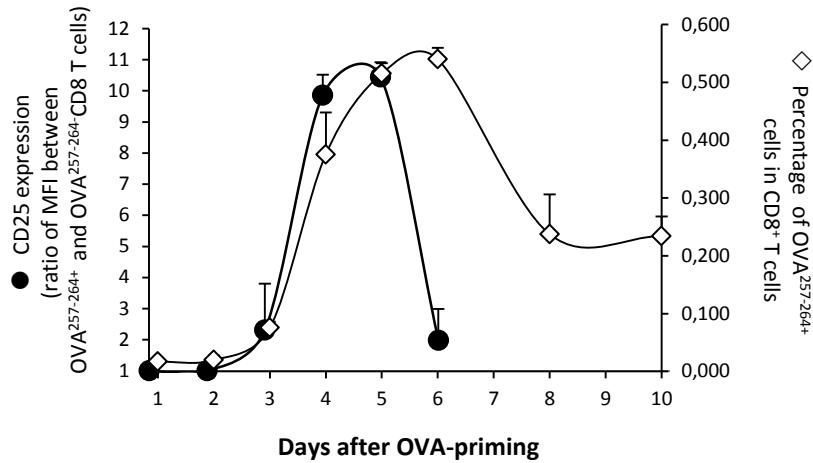

**Supplementary Figure S2: Kinetics of activation and expansion of specific CD8 T cells following OVA priming.** Foxp3-DTR mice were injected i.v. with  $10^4$  OT-I cells. Two days later, the mice were vaccinated with OVA. CD25 expression on OVA<sup>257-264</sup>-specific CD8 T cells was analyzed by flow cytometry daily from day 1 to day 6. Results are expressed as the CD25 MFI ratio between OVA<sup>257-264</sup>-specific CD8 T cells and OVA<sup>257-264</sup>-non specific CD8 T cells (closed circles). The percentage of OVA<sup>257-264</sup>-specific CD8 T cells among total CD8 T cells is also shown up to day 10 following OVA vaccination (open diamonds). Results are means  $\pm$  SD of data from 2 independent experiments with 3 mice per time-point.

### Supplementary Figure S3

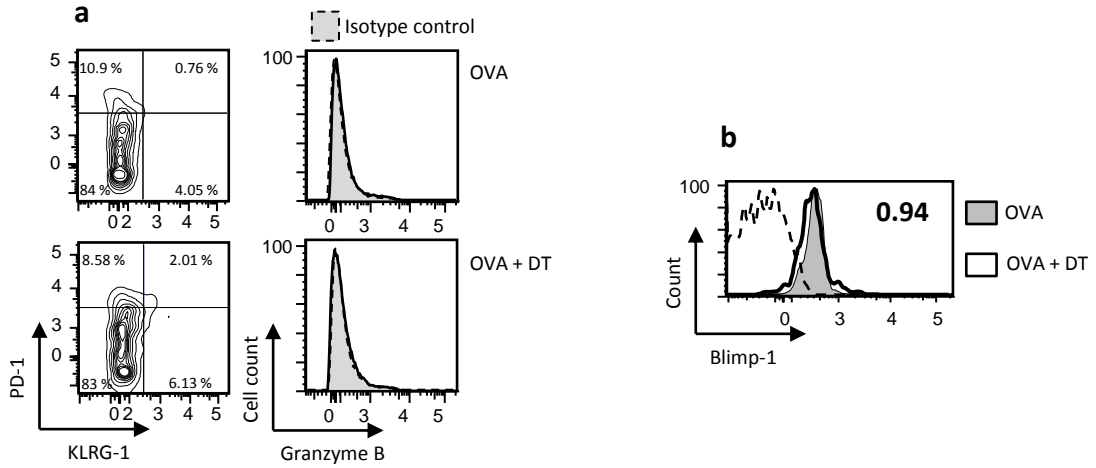

**Supplementary Figure S3: Expression of KLRG-1 and Blimp-1 in resting memory CD8 T cells generated in the presence or absence of Tregs.** Foxp3-DTR mice were injected i.v. with  $10^4$  OT-I cells. Two days later, the mice were vaccinated with OVA. Some mice received 2 injections of DT at day 3 and 5 (OVA + DT). Fifty days later, memory CD44<sup>+</sup> OVA<sup>257-264</sup>-specific CD8 T cells were analyzed by flow cytometry for KLRG-1, PD-1 and Granzyme B (**Supplementary Fig. S3a**) and Blimp-1 (**Supplementary Fig. S3b**) expression. In **Fig. S3b**, the number in the top right corner represents the MFI ratio between the OVA+DT and OVA conditions and was calculated as follows:  $[(\text{MFI OVA + DT} - \text{MFI isotype control}) / (\text{MFI OVA} - \text{MFI isotype control})]$ . Dashed lines represent the isotype control. Results shown in Fig. S3a and S3b are representative of 3 independent experiments involving 2-3 mice per condition per experiment.
